# Supplementary material for: Genetic Dissection and Validation of Chromosomal Regions for Transmission Ratio Distortion in Intersubspecific Crosses of Rice
Source: Front Plant Sci. 2020 Oct 27;11:563548. doi: 10.3389/fpls.2020.563548 (PMC7655136; doi:10.3389/fpls.2020.563548)
Supplement: Supplementary Table S3 — Genomic regions detected for allele transmission ratio distortion in the backcross inbred lines. [file Table_3.XLSX]

## Sheet: Sheet1
TABLE S3 | Genomic regions detected for allele transmission ratio distortion in the backcross inbred lines.
TRD name	Chra	TRD region (Mb)	Peak Binb							Towardsf	Overlapped genes/locus	Loci function	Reference
			Name	Region (Mb)	NIPc	9311c	χ² (df = 1)	P valued	LODe
TRD1.1	1	2.657-9.465	Bin80	7.454-7.63	0.08	0.92	63.48	1.62003e-15	17.1859	9311	DPL1	Segregation distortion/Hybrid incompatibility	Mizuta et al. 2010
TRD1.2	1	23.005-24.967	Bin233	23.387-23.473	0.15	0.85	21.3333	3.85962e-06	5.1704	9311	SaM/SaF	Hybrid male sterility	Long et al. 2008
TRD1.3	1	33.624-43.113	Bin390	38.334-38.434	0.54	0.46	179.413	6.509e-41	33.8322	NIP	Sd1	Segregation distortion	Li et al. 2017
TRD2.1	2	1.385-1.717	Bin453	1.386-1.495	0.34	0.67	15.4133	8.63767e-05	5.1383	NIP	S32	Hybrid sterility	Mizuta et al. 2010
TRD2.2	2	23.270-25.043	Bin654	23.776-23.821	0.35	0.65	22.4133	2.19843e-06	4.7253	NIP	/	/	/
TRD3.1	3	6.523-9.460	Bin879	8.673-8.829	0.09	0.91	54.6133	1.46737e-13	14.1746	9311	Sc	Transmission ratio distortion	Shen et al. 2017
TRD3.2	3	9.711-16.248	Bin910	12.338-12.564	0.05	0.95	85.3333	2.52078e-20	25.6614	9311	/	/	/
TRD4.1	4	7.033-14.593	Bin1188	11.818-12.253	0.14	0.86	24.6533	6.8626e-07	5.9025	9311	Sd4	Segregation distortion	Li et al. 2017
TRD4.2	4	17.380-21.568	Bin1238	19.348-19.475	0.38	0.62	34.68	3.88604e-09	7.2117	NIP	S9	Hybrid sterility	Wan et al. 1996
TRD5	5	25.780-29.803	Bin1676	28.742-28.842	0.38	0.62	36.0533	1.9199e-09	7.1056	NIP	/	/	/
TRD6.1	6	2.339-9.439	Bin1714	4.195-4.283	0.04	0.96	91.8533	9.33445e-22	27.2539	9311	DPL2	Segregation distortion/Hybrid incompatibility	Mizuta et al. 2010
TRD6.2	6	16.678-28.136	Bin1831	24.253-24.340	0.14	0.86	23.52	1.23622e-06	7.9691	9311	S6	Transmission ratio distortion	Koide et al. 2010
TRD8.1	8	2.953-9.504	Bin2207	8.320-8.389	0.08	0.92	59.8533	1.02196e-14	16.239	9311	/	/	/
TRD8.2	8	10.381-19.148	Bin2247	15.418-15.666	0.05	0.95	85.3333	2.52078e-20	25.0323	9311	Pf8	Hybrid fertility	Li et al. 2017
TRD8.3	8	23.890-28.024	Bin2361	27.478-27.652	0.15	0.85	21.3333	3.85962e-06	5.1036	9311	/	/	/
TRD12.1	12	0.0547-3.064	Bin3006	1.027-1.336	0.05	0.95	81.12	2.12419e-19	29.1498	9311	Sd12.1/qS12	Segregation distortion/Spikelet sterility	Li et al. 2017; Zhang et al. 2011
TRD12.2	12	9.351-12.489	Bin3088	10.97-11.007	0.35	0.65	22.4133	2.19843e-06	4.5101	NIP	/	/	/
TRD12.3	12	23.440-25.654	Bin3212	25.035-25.098	0.13	0.87	32.0133	1.53118e-08	7.7503	9311	Sd12.2	Segregation distortion	Li et al. 2017
a Chr represent chromosomes; b Bins showing the most significant effect of the region. c Allele frequency; d Chip-square test for allele frequency; e Logarithm of odds (LOD) value calculated by IciMapping; f Towards indicate the allele which showed preferential transmission. Physical position of a given bin based on MSU7.0 (http://rice.plantbiology.msu.edu/index.shtml).
