# Supplementary material for: Genetic Dissection and Validation of Chromosomal Regions for Transmission Ratio Distortion in Intersubspecific Crosses of Rice
Source: Front Plant Sci. 2020 Oct 27;11:563548. doi: 10.3389/fpls.2020.563548 (PMC7655136; doi:10.3389/fpls.2020.563548)
Supplement: Supplementary Table S5 — Validation of nine transmission ratio distortion regions in NZ-derived populations in the ZS97 background. [file Table_5.XLSX]

## Sheet: Sheet1
TABLE S5 | Validation of nine transmission ratio distortion regions in NZ-derived populations in the ZS97 background.
TRD region	Population	Marker	Chr.	Position	Observed allele frequencya				Towardsb	Samplec	Observed genotype frequencyd					Zygote selectione
					ZS97	NIP	χ² (df = 1)	P value			P1	H	P2	χ² (df = 2)	P value	χ² (df = 2)	P value
TRD1.3	NZ(TRD1.3)-derived population	RM11876	1	36.51	0.487179	0.512821	0.205128	0.650613	/	156	0.25641	0.461538	0.282051	1.12821	0.56887	0.90856	0.633268
		RM11945	1	37.86	0.490446	0.509554	0.11465	0.734911		157	0.254777	0.471338	0.273885	0.630573	0.72958	0.509744	0.774387
		GLT1	1	38.36	0.519108	0.480892	0.458599	0.49828		157	0.267516	0.503185	0.229299	0.464968	0.792562	0.00965351	0.995184
		RM8235	1	38.44	0.525478	0.474522	0.815287	0.366562		157	0.273885	0.503185	0.22293	0.821656	0.663101	0.0126866	0.993676
		GLT3	1	38.68	0.515924	0.484076	0.318471	0.572528		157	0.267516	0.496815	0.235669	0.324841	0.850084	0.0045116	0.997747
		GLT13	1	38.8	0.509804	0.490196	0.117647	0.731601		153	0.254902	0.509804	0.235294	0.176471	0.915545	0.0612	0.969851
		GLT4	1	38.92	0.519108	0.480892	0.458599	0.49828		157	0.254777	0.528662	0.216561	0.974522	0.614307	0.544136	0.761001
		ID0116	1	39.17	0.512739	0.487261	0.203822	0.651654		157	0.242038	0.541401	0.216561	1.28025	0.527225	1.0948	0.576151
		ID0117	1	39.83	0.525478	0.474522	0.815287	0.366562		157	0.254777	0.541401	0.203822	1.89172	0.388345	1.15097	0.559701
		RM12146	1	40.71	0.528662	0.471338	1.03185	0.309725		157	0.280255	0.496815	0.22293	1.03822	0.595051	0.00150241	0.999249
		GLT16	1	41.31	0.519737	0.480263	0.473684	0.491297		152	0.263158	0.513158	0.223684	0.578947	0.748657	0.118466	0.942433
TRD2.1	NZ(TRD2.1)-derived population	02C004	2	0.87	0.5	0.5	0	1	/	77	0.233766	0.532468	0.233766	0.324675	0.850154	0.324675	0.84957
		ID0201	2	1.01	0.506757	0.493243	0.027027	0.869417		74	0.22973	0.554054	0.216216	0.891892	0.640218	0.868106	0.64452
		02C009	2	2.39	0.513889	0.486111	0.111111	0.738883		72	0.25	0.527778	0.222222	0.333333	0.846482	0.228791	0.89156
TRD2.2	NZ(TRD2.2)-derived population	02C082	2	24.9914	0.51087	0.48913	0.0869565	0.768083	/	92	0.26087	0.5	0.23913	0.0869565	0.957453	2.05668e-05	0.99999
TRD3.1	NZ(TRD3.1)-derived population	03C037	3	7.99	0.537234	0.462766	1.04255	0.307228	/	94	0.255319	0.56383	0.180851	2.57447	0.276033	1.68655	0.422267
		03C038	3	8.29	0.543478	0.456522	1.3913	0.238185		92	0.282609	0.521739	0.195652	1.56522	0.457212	0.243331	0.884971
		03C041	3	9.4	0.5	0.5	0	1		92	0.25	0.5	0.25	0	1	0	1
		03C042	3	9.79	0.521505	0.478495	0.344086	0.55748		93	0.258065	0.526882	0.215054	0.612903	0.736054	0.288702	0.865137
TRD3.2	NZ(TRD3.2)-derived population	ID03C046	3	10.6416	0.5	0.5	0	1	/	78	0.269231	0.461538	0.269231	0.461538	0.793923	0.461538	0.792833
		ID03C051	3	12.39	0.5	0.5	0	1		77	0.25974	0.480519	0.25974	0.116883	0.943233	0.116883	0.94315
TRD4.1	NZ(TRD4.1)-derived population	RM551	4	0.1	0.543011	0.456989	1.37634	0.240725	ZS97	93	0.27957	0.526882	0.193548	1.64516	0.439297	0.353113	0.837277
		RM518	4	2.02	0.590426	0.409574	6.14894	0.0131491		94	0.308511	0.56383	0.12766	7.68085	0.0214845	2.58369	0.253452
		04C04188	4	4.18	0.601064	0.398936	7.68085	0.00558098		94	0.319149	0.56383	0.117021	9.21277	0.00998788	2.9016	0.208878
		04C08215	4	8.25	0.608696	0.391304	8.69565	0.0031897		92	0.369565	0.478261	0.152174	8.86957	0.0118576	0.00144873	0.999275
		RM401	4	13.2	0.625	0.375	11.5	0.000695962		92	0.358696	0.532609	0.108696	11.8913	0.00261719	1.70744	0.400762
TRD5	NZ(TRD5)-derived population	05C080	5	25.7	0.413043	0.586957	5.56522	0.0183207	NIP	92	0.163043	0.5	0.336957	5.56522	0.0618769	0.0894938	0.95602
		05C083	5	26.9	0.411111	0.588889	5.68889	0.0170727		90	0.144444	0.533333	0.322222	6.08889	0.0476228	0.926816	0.621238
		05C086	5	27.3	0.425532	0.574468	4.17021	0.0411406		94	0.159574	0.531915	0.308511	4.55319	0.102633	0.727323	0.690701
		05C091	5	28.7	0.404255	0.595745	6.89362	0.00865041		94	0.148936	0.510638	0.340426	6.93617	0.0311767	0.340098	0.841596
TRD8.1	NZ(TRD8.1)-derived population	ID08C9294	8	9.29	0.609375	0.390625	12.25	0.000465258	ZS97	128	0.414062	0.390625	0.195312	18.4	0.00010231	4.1236	0.125359
		ID08C9382	8	9.38	0.590062	0.409938	10.44	0.00122835		161	0.347826	0.484472	0.167702	10.6	0.0049854	0.000331723	0.999834
TRD12.2	NZ(TRD12.2)-derived population	12C016	12	5.6	0.522059	0.477941	0.264706	0.606905	/	68	0.220588	0.602941	0.176471	3.14706	0.207312	2.94858	0.213287
		ID1205	12	12.82	0.505618	0.494382	0.0224719	0.880839		89	0.235955	0.539326	0.224719	0.573034	0.750874	0.55247	0.757317
		RM28050	12	14.2	0.478947	0.521053	0.336842	0.561658		95	0.221053	0.515789	0.263158	0.431579	0.805905	0.106048	0.948288
a Allele frequency of assayed marker; b Towards indicates the allele that shows preferential transmission in heterozygotes. “/” indicate the two alleles in heterozygote were transmitted equally to the progeny. c The sample number of F2 populations. Physical position of the markers based on MSU7.0 (http://rice.plantbiology.msu.edu/index.shtml). d The genotype frequency of linked marker. P1 and P2 …
